# Supplementary material for: Ecdysone coordinates plastic growth with robust pattern in the developing wing
Source: bioRxiv or medRxiv preprint supplement (doi:10.1101/2020.12.16.423141), 2022-02-17
Supplement: Supplementary file [file media-1.pdf]

## Supplementary Figures

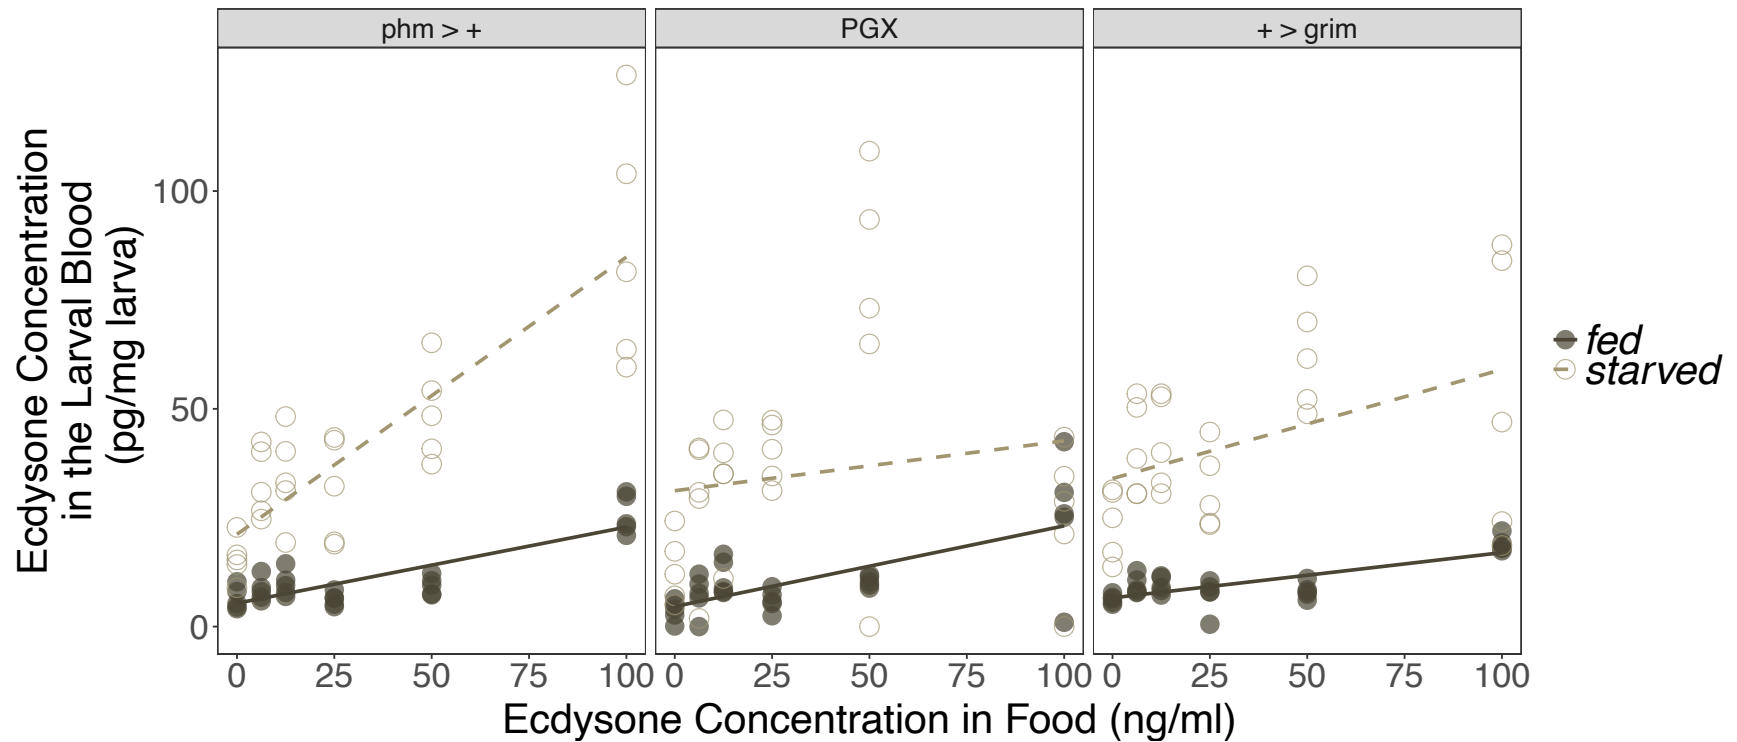

**Supplementary Figure 1: The effect of feeding 20E to larvae reared on a regular diet (fed) or 1% agar with 20% sucrose (starved) on circulating ecdysone levels.** There is a significant positive relationship between ecdysone concentration in the food and the concentration of ecdysone in the larval blood (Supplementary Table 6).

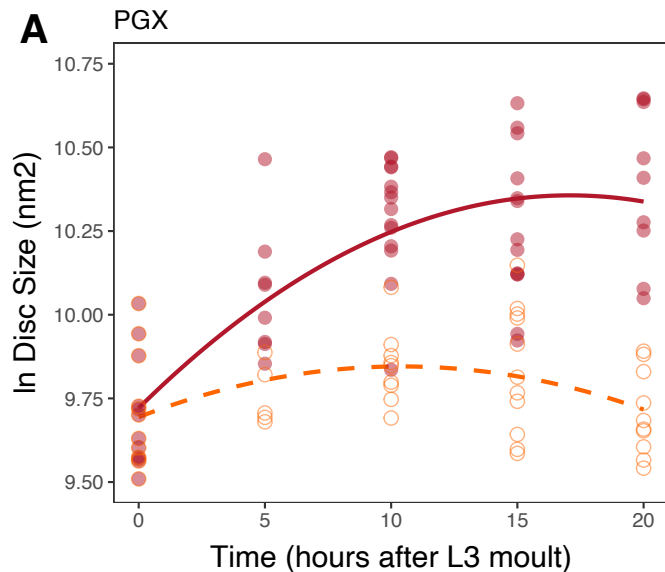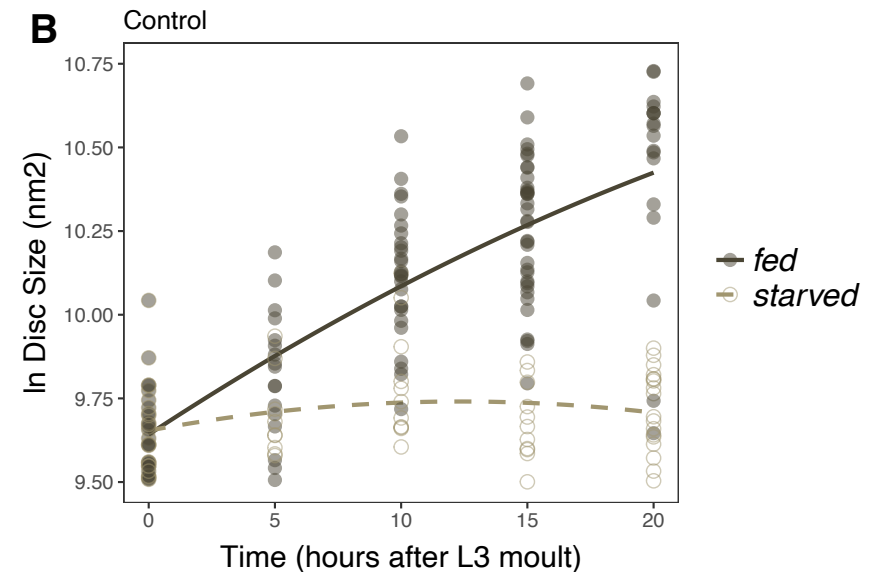

**Supplementary Figure 2: Wing imaginal disc growth is suppressed in fed PGX larvae relative to controls, and in starved larvae of both genotypes.** Larvae were fed on either normal food, or on 20% sucrose, 1% agar medium. Wing disc growth was modelled as a quadratic, and there was a significant interaction between genotype (PGX v. Control) and nutrition (fed v. starved) on growth (Supplementary Table 7). Solid line/closed point = fed larvae, broken line/open point = starved larvae. Control genotypes are the pooled results from both parental controls (either the *phm-GAL4; GAL80ts* or *UAS-GRIM* parental strain crossed to  $w^{1118}$ ).

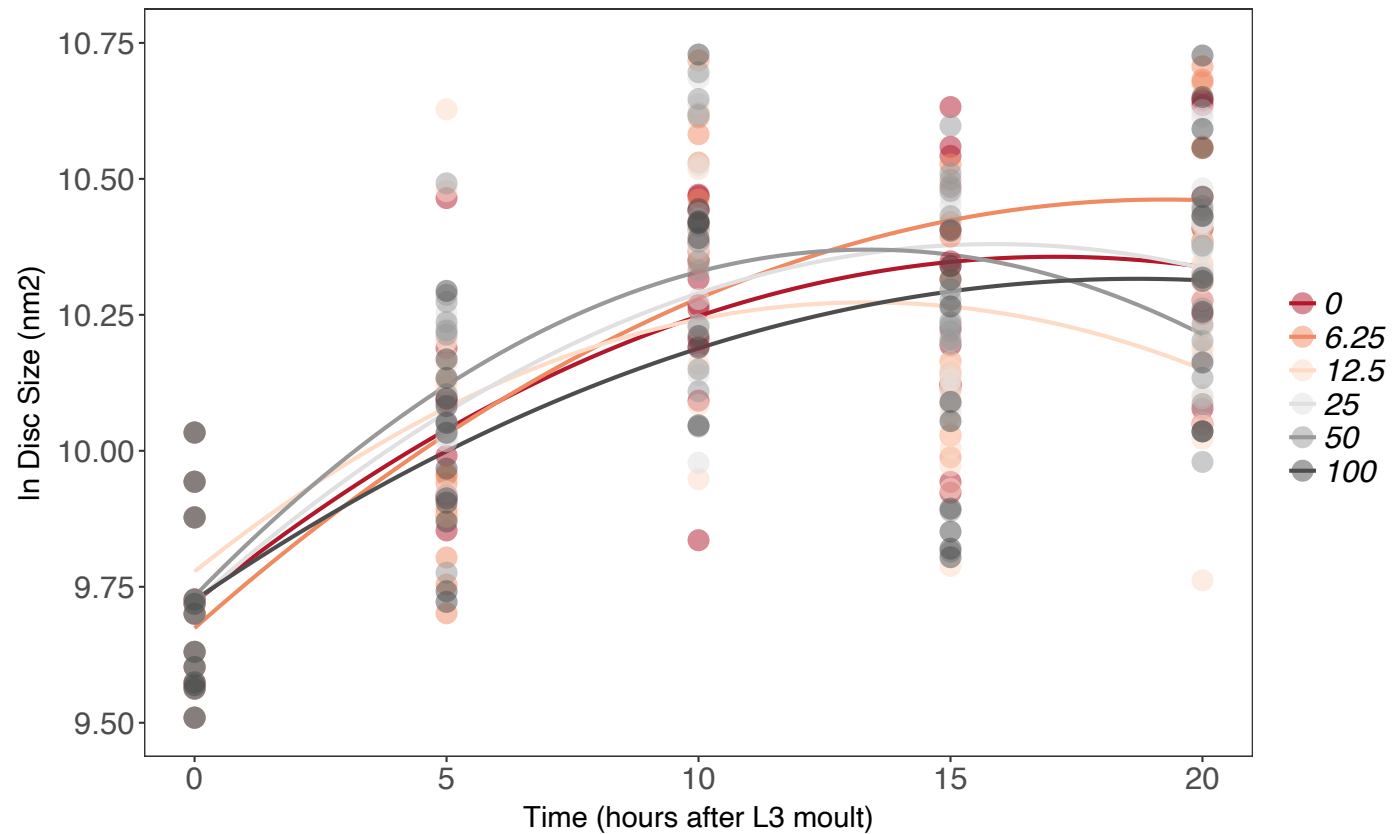

**Supplementary Figure 3: There is no effect of supplemental ecdysone dose on growth of the wing imaginal disc in fed PGX larvae.** Growth was modelled as  $S = E + T + T^2 + E*T + E*T^2$ , where  $S$  = disc size,  $E = 20E$  concentration, and  $T$  = time. There was no significant effect of  $E$  on the linear or quadratic growth rate of the wing imaginal discs (Supplementary Table 8).

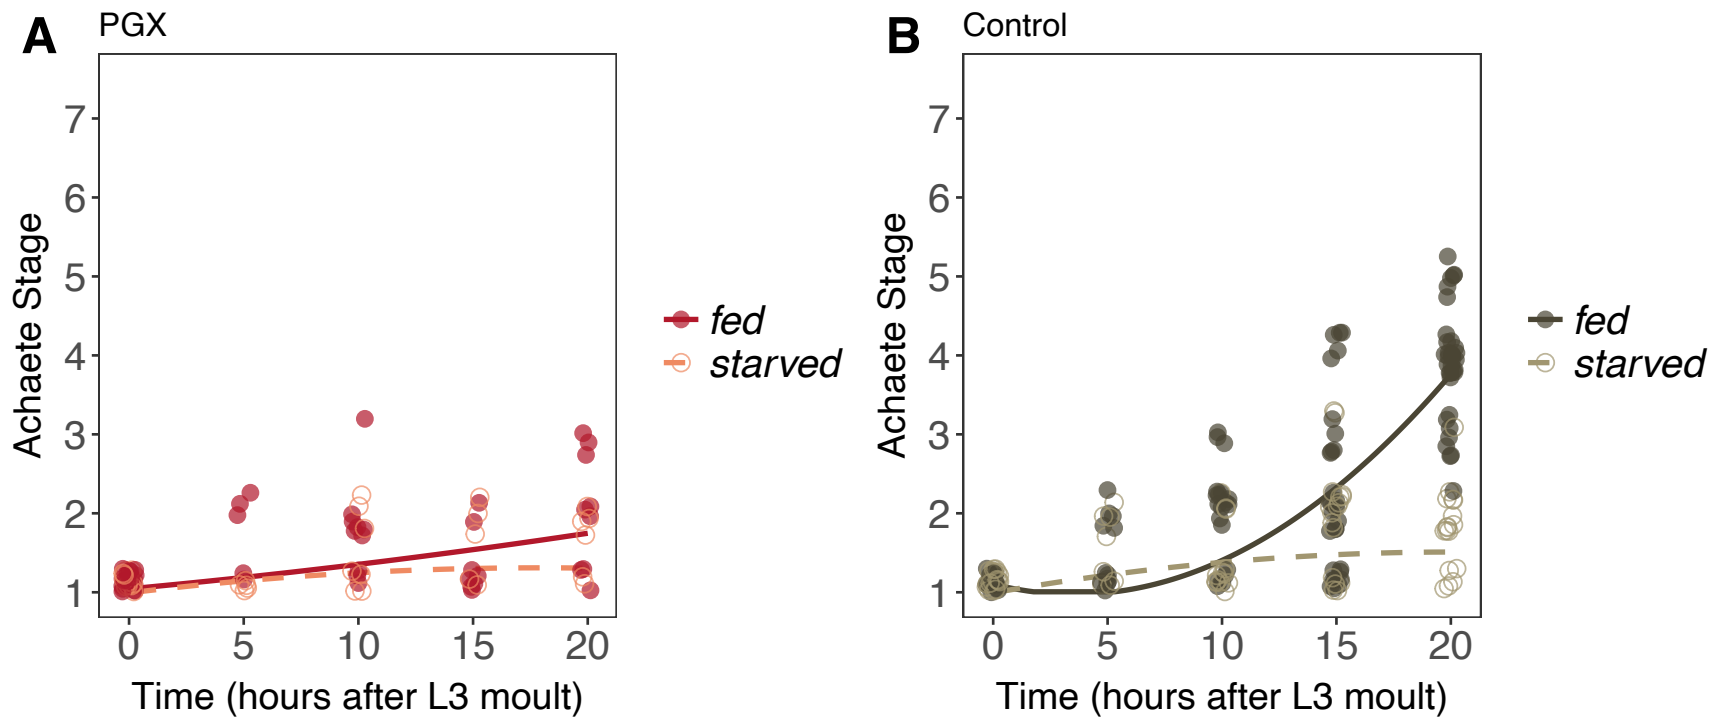

**Supplementary Figure 4: Achaete patterning in wing discs from fed and starved PGX and control larvae.** (A) Patterning does not progress in either fed or starved PGX larvae. (B) Patterning does not progress in starved control larvae but does in fed control larvae. There is a significant interaction between the effects of time and food on Achaete patterning in control larvae (orthogonal polynomial regression:  $F_{\text{food*time}^2} = 67.98$ ,  $P < 0.001$ ), but not in PGX larvae (orthogonal polynomial regression:  $F_{\text{food*time}^2} = 1.81$ ,  $P = 0.163$ ). See supplementary materials for details. Control genotypes are the pooled results from both parental controls (either the *phm-GAL4; GAL80<sup>ts</sup>* or *UAS-GRIM* parental strain crossed to *w<sup>1118</sup>*).

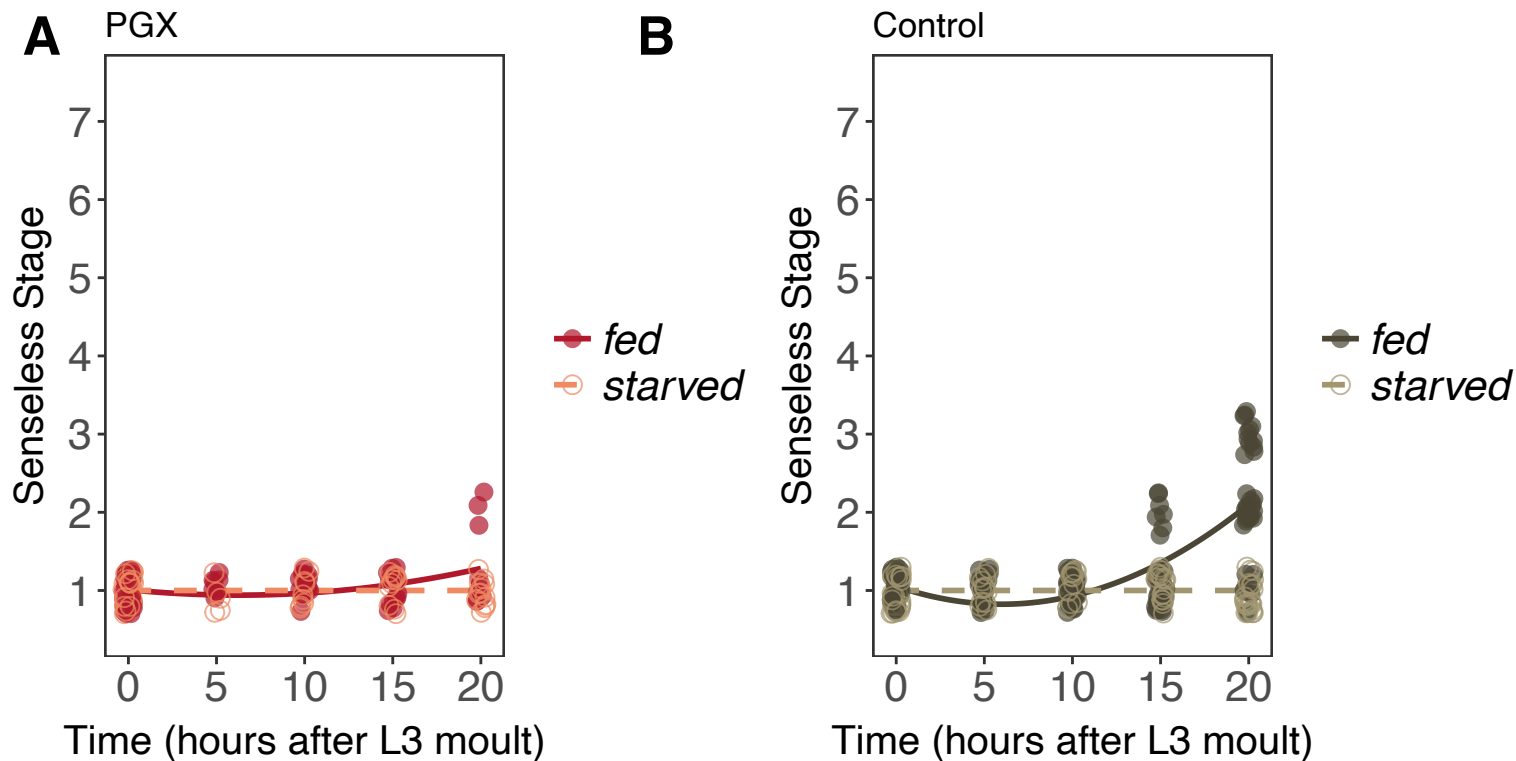

**Supplementary Figure 5: Senseless patterning in wing discs from fed and starved PGX and control larvae.** (A) Patterning does not progress in either fed or starved PGX larvae. (B) Patterning does not progress in starved control larvae but does in fed control larvae. There is a significant interaction between the effects of time and food on Achaete patterning in control larvae (linear regression:  $F_{\text{food*time}}=67.98$ ,  $P < 0.001$ ). In PGX larvae Senseless patterning does not progress at all in starved larvae (linear regression:  $F_{\text{time}}=0.057$ ,  $P = 0.82$ ), but does in fed larvae (linear regression:  $F_{\text{time}}=9.76$ ,  $P < 0.01$ ). Control genotypes are the pooled results from both parental controls (either the *phm-GAL4; GAL80ts* or *UAS-GRIM* parental strain crossed to  $w^{1118}$ ).

## Supplementary Tables

**Supplementary Table 1:** Comparing the Gompertz growth curve parameters for wing imaginal discs from PGX and control (+>*Grim* and *phm>+*) larvae.

| Genotype/Condition | Asymptote (a) <sup>A</sup> | <i>F</i> <sup>B</sup> | Displacement along x (b) <sup>A</sup> | <i>F</i> <sup>B</sup> | Growth rate (c) <sup>A</sup> | <i>F</i> <sup>B</sup> |
|--------------------|----------------------------|-----------------------|---------------------------------------|-----------------------|------------------------------|-----------------------|
| PGX                | 10.53 (10.45–10.65)        | 52.62***              | 0.11 (0.10–0.13)                      | 68.91***              | 0.90 (0.85–0.94)             | 5.45*                 |
| Control            | 11.57 (11.42–11.74)        |                       | 0.22 (0.21–0.24)                      |                       | 0.95 (0.94–0.95)             |                       |

<sup>A</sup> Values in parentheses are 95% confidence intervals.

<sup>B</sup> *F*-test of whether parameter value differs between genotype/condition. \* *p* value < 0.05, \*\*\* *p* value < 0.0001.

**Supplementary Table 2:** Comparing the Gompertz curve parameters of Achaete patterning against time for wing imaginal discs from PGX and control (+>*Grim* and *phm>+*) larvae.

| Genotype/Condition | Asymptote (a) <sup>A</sup> | <i>F</i> <sup>B</sup> | Displacement along x (b) <sup>A</sup> | <i>F</i> <sup>B</sup> | Growth rate (c) <sup>A</sup> | <i>F</i> <sup>B</sup> |
|--------------------|----------------------------|-----------------------|---------------------------------------|-----------------------|------------------------------|-----------------------|
| PGX                | 3.98 (3.56–4.41)           | 12.62***              | 1.03(0.84–1.21)                       | 12.05***              | 0.045 (0.029-0.063)          | 0.56                  |
| Control            | 6.34 (6.20–7.08)           |                       | 1.64 (1.42–1.87)                      |                       | 0.074<br>(0.059-0.090)       |                       |

<sup>A</sup> Values in parentheses are 95% confidence intervals.

<sup>B</sup> *F*-test of whether parameter value differs between genotype/condition. \* *p* value < 0.05, \*\*\* *p* value < 0.0001.

**Supplementary Table 3:** Comparing the linear Senseless patterning parameters for wing imaginal discs from PGX and control (+>*Grim* and *phm*>+) larvae.

| Genotype/Condition | Intercept (a) <sup>A</sup> | F <sup>B</sup> | Slope (b) <sup>A</sup> | F <sup>B</sup> |
|--------------------|----------------------------|----------------|------------------------|----------------|
| PGX                | 1.25 (0.94–1.55)           | 25.89***       | 0.01(0.00–0.02)        | 583.26***      |
| Control            | 0.46 (0.21–0.72)           |                | 0.13 (10.12–0.14)      |                |

<sup>A</sup> Values in parentheses are 95% confidence intervals.

<sup>B</sup> F-test of whether parameter value differs between genotype/condition. \* *p* value < 0.05, \*\*\* *p* value < 0.0001.

**Supplementary Table 4:** Comparing the parameters of the linear relationship for Achaete pattern against (log) disc size, between Samarkand larvae reared at 18°C, 25°C, and 29°C, between *phm* > *InR* and their parental control line (+ > *InR*), and between P0206 > *PTEN* and their parental control line (+ > *PTEN*).

| Genotype/Condition      | Intercept (A) <sup>A</sup> | F <sup>B</sup> | Slope (B) <sup>A</sup> | F <sup>B</sup> |
|-------------------------|----------------------------|----------------|------------------------|----------------|
| <i>phm</i> > <i>InR</i> | -14.99 (-17.32–12.65)      | 22.42***       | 1.93 (1.70-2.15)       | 660.67**       |
| P0206> <i>PTEN</i>      | - 12.23(-13.72–10.75)      |                | 1.61 (1.44–1.78)       |                |
| Control                 | -16.40 (-18.45–14.23)      |                | 1.97 (1.83-2.10)       |                |

<sup>A</sup> Parameter values are for a linear model  $y = B + Ax$ , where *x* is disc size and *y* is Achaete pattern. If a parameter value was not significantly different between genotypes/conditions, the model was re-fit with a single value for that parameter across genotype/conditions, and the remaining parameter values were recalculated.

<sup>B</sup> F-test for when the parameter value differs between genotype/condition. <sup>NS</sup> *p* value > 0.05, \**p* value < 0.05, \*\**p* value < 0.01, \*\*\* *p* value < 0.001.

**Supplementary Table 5:** Comparing the parameters of the logistic relationship for Senseless pattern against (log) disc size, between Samarkand larvae reared at 18°C, 25°C, and 29°C, between *phm* > *InR* and their parental control line (+ > *InR*), and between P0206 > *PTEN* and their parental control line (+ > *PTEN*).

| Genotype/<br>Condition | Minimum (A) <sup>A</sup> | F <sup>B</sup>     | Maximum (B) <sup>A</sup> | F <sup>B</sup> | Point of inflection (C) <sup>A</sup> | F <sup>B</sup> | Logistic Growth rate (D) <sup>A</sup> | F <sup>B</sup> |
|------------------------|--------------------------|--------------------|--------------------------|----------------|--------------------------------------|----------------|---------------------------------------|----------------|
| <i>Phm&gt;InR</i>      | 0.92 (0.32 – 1.52)       | 0.12 <sup>NS</sup> | 7.13 (5.72–8.54)         | 3.61*          | 10.42 (10.14–10.69)                  | 6.94**         | 2.13 (1.40 – 4.45)                    | 5.89**         |
| <i>P0206&gt;PTEN</i>   | 1.00 (0.73-1.27)         |                    | 7.15 (6.31–8.00)         |                | 10.97 (10.84–11.10)                  |                | 4.65 (3.31–7.84)                      |                |
| Control                | 1.04 (0.80-1.29)         |                    | 8.91 (7.08–10.73)        |                | 11.22 (10.99–11.45)                  |                | 2.39 (1.86–3.35)                      |                |

<sup>A</sup> Parameter values for the four-parameter logistic model  $y = A + (B - A)/(1 + e^{D(C-x)})$ , where *x* is disc size and *y* is Senseless pattern. Values in parentheses are Bonferroni-corrected 95% confidence intervals. If a parameter value was not significantly different between genotypes/conditions, the model was re-fit with a single value for that parameter across genotype/conditions, and the remaining parameter values were re-calculated.

<sup>B</sup> F-test for when the parameter value differs between genotype/condition. <sup>NS</sup> *p* value > 0.05, \**p* value < 0.05, \*\**p* value < 0.01, \*\*\* *p* value < 0.001.

**Supplementary Table 6:** Effect of ecdysone supplementation on titres of ecdysone in the larval blood of control (*phm* > + and + > *grim*) and PGX larvae under starved and fed conditions.

| Factor <sup>A</sup>      | df | Chi Square | P      |
|--------------------------|----|------------|--------|
| Ecdysone                 | 1  | 59.61      | <0.001 |
| Food                     | 2  | 179.13     | <0.001 |
| Genotype                 | 2  | 2.71       | 0.32   |
| Ecdysone: Food           | 1  | 8.02       | 0.005  |
| Ecdysone: Genotype       | 2  | 13.16      | 0.001  |
| Food: Genotype           | 2  | 2.46       | 0.29   |
| Ecdysone: Food: Genotype | 2  | 11.93      | 0.003  |



**Supplementary Table 7:** Effect of diet type on wing disc growth in PGX and control (*phm* > + and + > *grim*) larvae under starved and fed conditions.

| Factor                            | df | <i>F</i> value | <i>P</i> |
|-----------------------------------|----|----------------|----------|
| Genotype                          | 1  | 1.4            | 0.24     |
| Food                              | 1  | 278.5          | <0.001   |
| Time <sup>2</sup>                 | 2  | 202.5          | <0.001   |
| Genotype: Food                    | 1  | 8.7            | 0.003    |
| Genotype: Time <sup>2</sup>       | 2  | 13.2           | <0.001   |
| Food: Time <sup>2</sup>           | 2  | 98.7           | <0.001   |
| Genotype: Food: Time <sup>2</sup> | 2  | 5.31           | 0.005    |

**Supplementary Table 8:** Effect of ecdysone concentration on growth of the wing imaginal disc in starved and fed PGX larvae.

| Factor <sup>A</sup>             | Starved |     |          |          | Fed  |     |          |          |
|---------------------------------|---------|-----|----------|----------|------|-----|----------|----------|
|                                 | SS      | df  | <i>F</i> | <i>P</i> | SS   | df  | <i>F</i> | <i>P</i> |
| Ecdysone                        | 1.5     | 1   | 27.3     | <0.001   | 0    | 1   | 1.35E-01 | 0.7137   |
| Disc Age <sup>2</sup>           | 7.2     | 2   | 64.6     | <0.001   | 36.6 | 2   | 29.8     | <0.001   |
| Ecdysone: Disc Age <sup>2</sup> | 1       | 2   | 8.88     | <0.001   | 0    | 2   | 4.01E-01 | 0.6697   |
| Residuals                       | 22.3    | 403 |          |          | 27.8 | 453 |          |          |

<sup>A</sup> Factors where fit using an orthogonal polynomial regression.

**Supplementary Table 9:** Parameters describing the effect of ecdysone on growth of the wing imaginal disc in starved PGX larvae.

| Parameter <sup>A</sup>           | Parameter Value <sup>B</sup> | <i>t</i> -value <sup>C</sup> | <i>P</i> |
|----------------------------------|------------------------------|------------------------------|----------|
| Intercept                        | 9.48                         | 604.39                       | <0.001   |
| Ecdysone                         | 0.0002                       | 5.22                         | <0.001   |
| Disc Age                         | 0.059                        | 10.06                        | <0.001   |
| Disc Age <sup>2</sup>            | -0.0021                      | -5.20                        | <0.001   |
| Ecdysone * Disc Age              | 0.0004                       | 3.80                         | <0.001   |
| Ecdysone * Disc Age <sup>2</sup> | <0.0001                      | -1.81                        | 0.0707   |

<sup>A</sup> Disc size through time was modelled as an orthogonal polynomial regression  $S = E + T + T^2 + E*T + E*T^2$ , where *S* = disc size, *E* = ecdysone concentration, and *T* = disc age.

<sup>B</sup> Parameter values are for non-orthogonal polynomial regression to facilitate interpretation.

<sup>C</sup> *t*-value is for orthogonal parameters

**Supplementary Table 10:** Comparing the linear/Gompertz curve parameters of Achaete patterning against time for wing imaginal discs from fed PGX larvae supplemented with different quantities of ecdysone

| Ecdysone (ng/ml of food) | Intercept <sup>c</sup> | F <sup>D</sup> | Slope <sup>c</sup>  | F <sup>D</sup>      | Asymptote (a) <sup>c</sup> | F <sup>D</sup> | Displacement along x (b) <sup>c</sup> | F <sup>D</sup> | Growth rate (c) <sup>c</sup> | F <sup>D</sup> |
|--------------------------|------------------------|----------------|---------------------|---------------------|----------------------------|----------------|---------------------------------------|----------------|------------------------------|----------------|
| 0 <sup>A</sup>           | 1.03<br>(0.82-1.24)    | 0.10           | 0.03<br>(0.01-0.05) | 2.41                |                            |                |                                       |                |                              |                |
| 6.25 <sup>A</sup>        | 1.08<br>(0.79-1.38)    |                | 0.05<br>(0.03-0.08) |                     |                            |                |                                       |                |                              |                |
| 6.25 <sup>B</sup>        |                        |                |                     |                     | 2.08<br>(1.39-2.77)        | 7.89***        | 0.77 (<br>0.28-1.25)                  | 6.49***        | 0.19<br>(-0.10-0.58)         | 1.20           |
| 12.5 <sup>B</sup>        |                        |                |                     | 3.5<br>(3.06-3.95)  | 1.3<br>(0.96-1.65)         |                | 0.22<br>(0.10-0.34)                   |                |                              |                |
| 25 <sup>B</sup>          |                        |                |                     | 4.7<br>(3.76-5.65)  | 1.55<br>(1.24-1.85)        |                | 0.14<br>(0.08-0.22)                   |                |                              |                |
| 50 <sup>B</sup>          |                        |                |                     | 4.54<br>(3.74-5.33) | 1.55<br>(1.24-1.85)        |                | 0.16<br>(0.09-0.23)                   |                |                              |                |
| 100 <sup>B</sup>         |                        |                |                     | 5.27<br>(4.21-6.33) | 1.72<br>(1.40-2.04)        |                | 0.14<br>(0.08-0.20)                   |                |                              |                |

<sup>A</sup> Patterning through time was modelled as a linear function  $S = E + T + E*T$ , where  $S$  is patterning stage,  $E$  is supplemental ecdysone level (categorical) and  $T$  is time (continuous).

<sup>B</sup> Patterning through time was modelled as Gompertz function fit to each supplemental ecdysone level.

<sup>C</sup> Values in parentheses are Bonferroni-corrected 95% confidence intervals for all pairwise comparisons.

<sup>D</sup>  $F$ -test of whether parameter value differs between ecdysone levels. \*  $p$  value < 0.05, \*\*\*  $p$  value < 0.0001. See supplementary methods for details.

**Supplementary Table 11:** Comparing the linear/Gompertz curve parameters of Achaete patterning against time for wing imaginal discs from starved PGX larvae supplemented with different quantities of ecdysone

| Ecdysone (ng/ml of food) | Intercept <sup>c</sup> | F <sup>D</sup> | Slope <sup>c</sup>  | F <sup>D</sup>        | Asymptote (a) <sup>c</sup> | F <sup>D</sup> | Displacement along x (b) <sup>c</sup> | F <sup>D</sup> | Growth rate (c) <sup>c</sup> | F <sup>D</sup> |
|--------------------------|------------------------|----------------|---------------------|-----------------------|----------------------------|----------------|---------------------------------------|----------------|------------------------------|----------------|
| 0 <sup>A</sup>           | 1.01<br>(0.77-1.26)    | 0.07           | 0.02<br>(0.00-0.04) | 7.65***               |                            |                |                                       |                |                              |                |
| 6.25 <sup>A</sup>        | 0.96<br>(0.62-1.30)    |                | 0.03<br>(0.00-0.06) |                       |                            |                |                                       |                |                              |                |
| 12.5 <sup>B</sup>        | 1.00<br>(0.66-1.34)    |                | 0.07<br>(0.04-0.10) |                       |                            |                |                                       |                |                              |                |
| 12.5 <sup>B</sup>        |                        |                |                     |                       | 4.24<br>(-12.90 - 21.37)   | 1.05           | 1.44<br>(-2.47-5.36)                  | 0.81           | 0.04<br>(-0.13-0.26)         | 1.51           |
| 25 <sup>B</sup>          |                        |                |                     | 9.00<br>(1.37- 16.63) | 2.28<br>(1.54-3.04)        |                | 0.06<br>(0.02-0.11)                   |                |                              |                |
| 50 <sup>B</sup>          |                        |                |                     | 5.54<br>(3.94-7.15)   | 1.84<br>(1.44-2.25)        |                | 0.12<br>(0.06-0.20)                   |                |                              |                |
| 100 <sup>B</sup>         |                        |                |                     | 6.41<br>(4.17-8.65)   | 2.00<br>(1.59-2.41)        |                | 0.11<br>(0.05-0.17)                   |                |                              |                |

<sup>A</sup> Patterning through time was modelled as a linear function  $S = E + T + E*T$ , where  $S$  is patterning stage,  $E$  is supplemental ecdysone level (categorical) and  $T$  is time (continuous).

<sup>B</sup> Patterning through time was modelled as Gompertz function fit to each supplemental ecdysone level.

<sup>C</sup> Values in parentheses are Bonferroni-corrected 95% confidence intervals for all pairwise comparisons.

<sup>D</sup> F-test of whether parameter value differs between ecdysone levels. \*  $p$  value < 0.05, \*\*\*  $p$  value < 0.0001. See supplementary methods for details.

**Supplementary Table 12:** Comparing the linear model parameters of Senseless patterning against time for wing imaginal discs from fed PGX larvae supplemented with different quantities of ecdysone

| Ecdysone <sup>A</sup><br>(ng/ml of food) | Intercept <sup>B</sup> | F <sup>C</sup> | Slope <sup>B</sup> | F <sup>C</sup> | Tukey HSD <sup>D</sup> |
|------------------------------------------|------------------------|----------------|--------------------|----------------|------------------------|
| 0                                        | 0.97 (0.77–1.17)       | 0.2627         | 0.01 (-0.01–0.03)  | 45.1206***     | A                      |
| 6.25                                     | 0.99 (0.51–1.46)       |                | 0.02 (-0.03–0.06)  |                | A                      |
| 12.5                                     | 1.03 (0.55–1.5)        |                | 0.03 (-0.02–0.07)  |                | A                      |
| 25                                       | 0.95 (0.47–1.42)       |                | 0.08 (0.04–0.13)   |                | B                      |
| 50                                       | 0.97 (0.5–0.26)        |                | 0.09 (0.05–0.14)   |                | B                      |
| 100                                      | 0.93 (0.46–1.4)        |                | 0.1 (0.05–0.14)    |                | B                      |

<sup>A</sup> Patterning through time was modelled as a linear function  $S = E + T + E*T$ , where  $S$  is patterning stage,  $E$  is supplemental ecdysone level (categorical) and  $T$  is time (continuous).

<sup>B</sup> Values in parentheses are Bonferroni-corrected 95% confidence intervals for all pairwise comparisons.

<sup>C</sup> F-test of whether parameter value differs between ecdysone levels. \*  $p$  value < 0.05, \*\*\*  $p$  value < 0.0001. See supplementary methods for details.

<sup>D</sup> Tukey HSD comparison of slopes among ecdysone levels. Levels with different letters are significantly different.

**Supplementary Table 13:** Comparing the linear parameters of Senseless patterning against time for wing imaginal discs from starved PGX larvae supplemented with different quantities of ecdysone

| Ecdysone <sup>A</sup><br>(ng/ml of food) | Intercept <sup>B</sup> | <i>F</i> <sup>C</sup> | Slope <sup>B</sup> | <i>F</i> <sup>C</sup> | Tukey HSD <sup>D</sup> |
|------------------------------------------|------------------------|-----------------------|--------------------|-----------------------|------------------------|
| 0                                        | 1 (0.74–1.26)          | 0.1958                | 0 (-0.02–0.02)     | 53.9490***            | A                      |
| 6.25                                     | 0.98 (0.35–1.6)        |                       | 0.01 (-0.05–0.06)  |                       | A                      |
| 12.5                                     | 0.97 (0.34–1.59)       |                       | 0.02 (-0.03–0.08)  |                       | A                      |
| 25                                       | 0.9 (0.28–1.53)        |                       | 0.09 (0.03–0.14)   |                       | B                      |
| 50                                       | 0.95 (0.33–0.27)       |                       | 0.1 (0.05–0.16)    |                       | B                      |
| 100                                      | 0.91 (0.29–1.53)       |                       | 0.14 (0.08–0.19)   |                       | C                      |

<sup>A</sup> Patterning through time was modelled as a linear function  $S = E + T + E*T$ , where  $S$  is patterning stage,  $E$  is supplemental ecdysone level (categorical) and  $T$  is time (continuous).

<sup>B</sup> Values in parentheses are Bonferroni-corrected 95% confidence intervals for all pairwise comparisons.

<sup>C</sup>  $F$ -test of whether parameter value differs between ecdysone levels. \*  $p$  value < 0.05, \*\*\*  $p$  value < 0.0001. See supplementary methods for details.

<sup>D</sup> Tukey HSD comparison of slopes among ecdysone levels. Levels with different letters are significantly different.
